# Supplementary material for: Targeting Lipocalin-2 in Inflammatory Breast Cancer Cells with Small Interference RNA and Small Molecule Inhibitors
Source: MDPI journal article supplement (doi:10.3390/ijms22168581), 2021-08-10
Supplement: s1 [file s1]

## Targeting Lipocalin-2 in Inflammatory Breast Cancer Cells with Small Interference RNA and Small Molecule Inhibitors

Ginette S. Santiago-Sánchez, Ricardo Noriega-Rivera, Eliud Hernández-O'Farrill, Fatma Valiyeva, Blanca Quiñones-Díaz, Emily S. Villodre, Bisrat G. Debeb, Andrea Rosado-Albacarys, and Pablo E. Vivas-Mejía

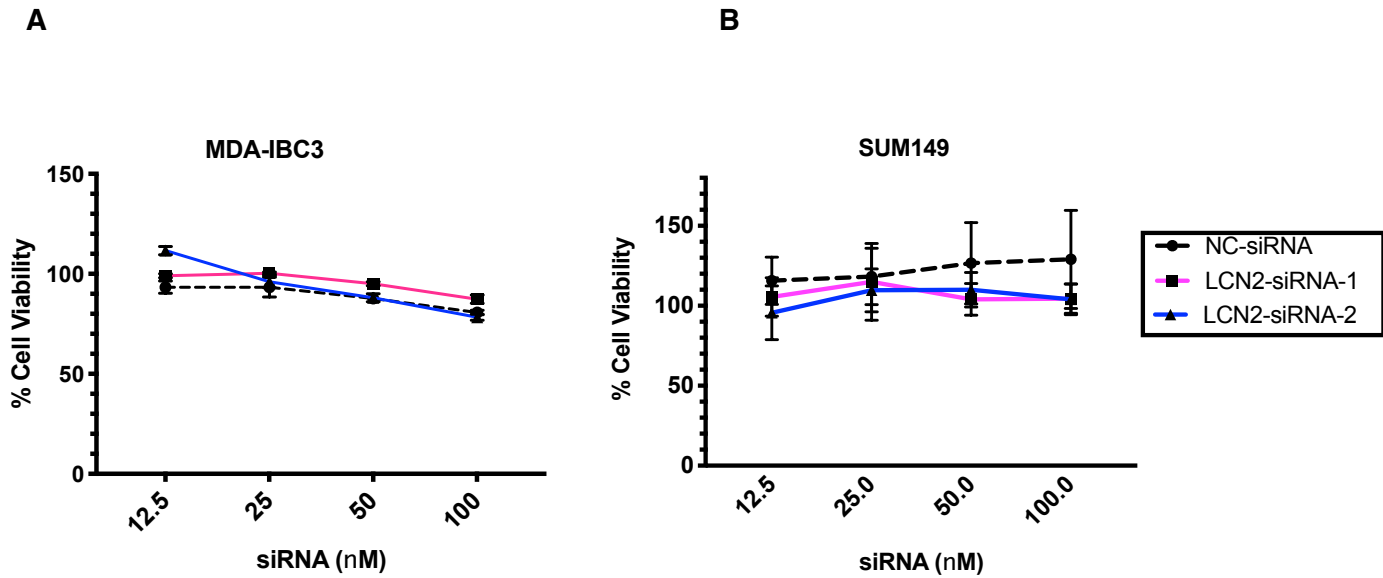

**Figure S1| Effect of LCN2 silencing on cell viability of IBC cells.** Cell viability was assessed in (A) MDA-IBC3 and (B) SUM149 with Alamar Blue dye 72 hours after negative control (NC-siRNA), LCN2-siRNA-1, and LCN2-siRNA-2 transfection. No significant difference was observed between LCN2-siRNAs and NC-siRNA. Results are shown as Mean  $\pm$  SEM of triplicate experiments.

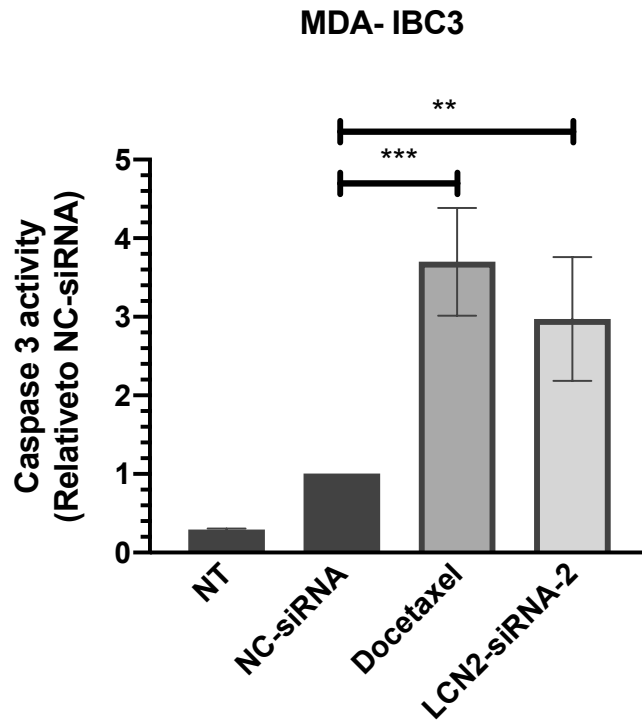

**Figure S2 | LCN2-siRNA-based silencing induces Caspase-3 activation in MDA-IBC3 cells.** Caspase-3 fluorometric activity assay in MDA-IBC3 cells after LCN2-siRNA-2 and NC-siRNA transfection, and docetaxel treatment as positive control. Results are shown as Mean  $\pm$  SEM of triplicate experiments (\*\* $P < 0.01$ , \*\*\* $P < 0.001$ ).

**A**

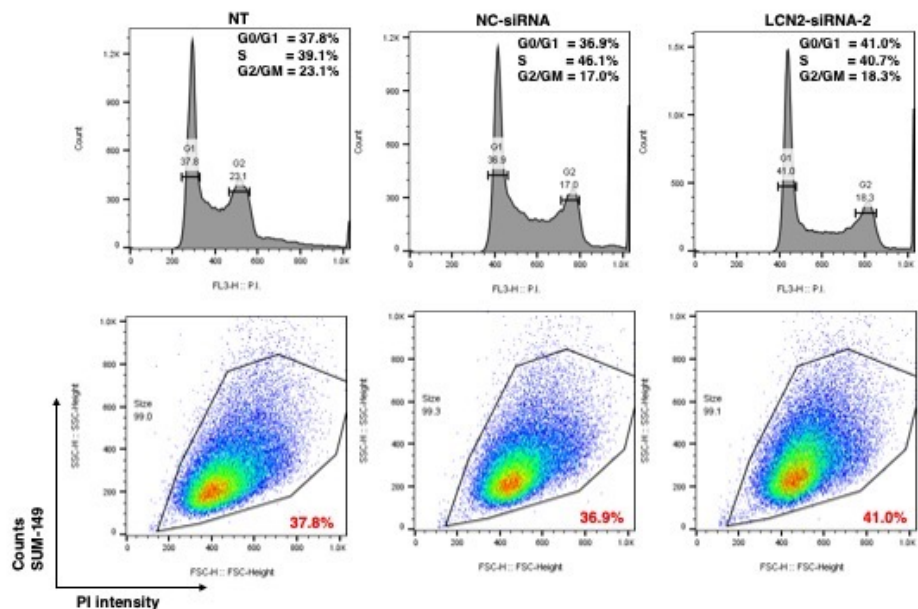

**B**

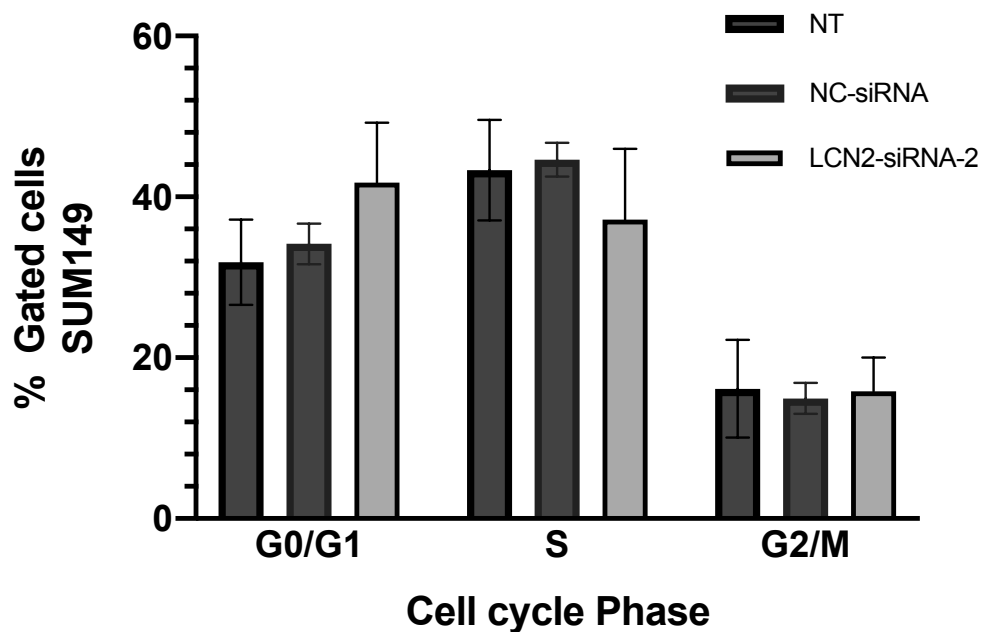

**Figure S3|** Assessment of cell cycle progression was performed by flow cytometry after LCN2-siRNA silencing in IBC cells. (A) Histogram showing a tendency in cell cycle arrest at G0/G1 to S phase transition 48 hours after LCN2-siRNA-2 transfection in SUM149 cells compared to NC-siRNA. (B) Quantification of flow cytometry data showing an increase in SUM-149-LCN2-siRNA-2 (41.8%) transfected cells at G0/G1 to S phase transition compared to NC-siRNA (34.2%).

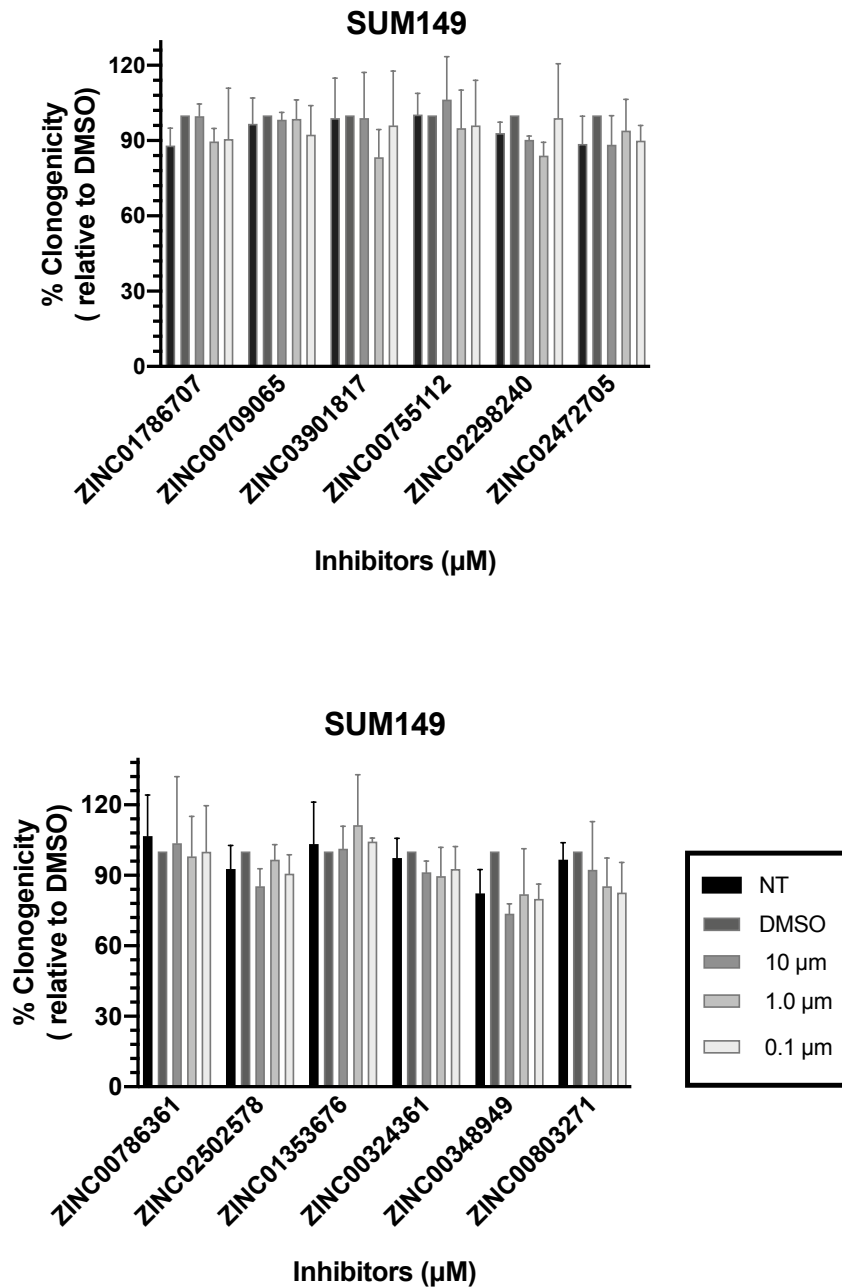

**Figure S4|** LCN2 inhibitors not showing reduction in cell proliferation in IBC cells. Colony formation assay was performed in SUM-149 cells after treatment with LCN2 inhibitors at 10  $\mu\text{M}$ , 1  $\mu\text{M}$ , and 0.1  $\mu\text{M}$ . The percentage of clonogenicity was calculated relative to DMSO. Results are shown as Mean  $\pm$  SEM of triplicate experiments.



**Table S1 | Receptor expression in IBC and non-IBC cell lines.**

Inflammatory Breast Cancer Cell Lines: IBC-3 (PR-, ER-, HER2+), SUM-149 (PR-, ER-, HER2-).  
Non-Inflammatory Breast Cancer Cell Lines: metastatic (MDA-MB-435 (ER-, PR, HER2+), MDA-MB-231 (ER-, PR-, HER2-), and non-metastatic (MCF7 (ER+, PR+, HER2-)).

| Breast Cancer Lines | Markers |    |      |                |
|---------------------|---------|----|------|----------------|
| IBC                 | ER      | PR | HER2 |                |
| SUM-149             | -       | -  | -    | Metastatic     |
| MDA-IBC3            | -       | -  | +    | Metastatic     |
| NON-IBC             |         |    |      |                |
| SKBR-3              | -       | -  | +    | Metastatic     |
| MDA-MB-231          | -       | -  | -    | Metastatic     |
| MDA-MB-435          | -       | -  | +    | Metastatic     |
| MCF7                | +       | +  | -    | Non-Metastatic |

**Table S2: Predicted physicochemical, lipophilicity, water solubility, druglikeness, and PAINS properties of LCN2 inhibitors and compound derivatives.** <sup>a</sup> MW = molecular weight (g/mol). <sup>b</sup> TPSA = Topological polar surface area (Å<sup>2</sup>). <sup>c</sup> Lipinski rule-of-five: number of violations. <sup>d</sup> PAINS: Pan Assay Interference Structures alert identify potentially problematic fragments.

| Molecule ID  | Physicochemical Properties |                   |                 |                  |               | Lipophilicity (LogP) | Water solubility |                    | Druglikeness          |                       | PAINS <sup>d</sup> |
|--------------|----------------------------|-------------------|-----------------|------------------|---------------|----------------------|------------------|--------------------|-----------------------|-----------------------|--------------------|
|              | MW <sup>a</sup>            | TPSA <sup>b</sup> | Rotatable bonds | H-bond acceptors | H-bond donors |                      | LogS             | Solubility         | Lipinski <sup>c</sup> | Bioavailability score |                    |
| ZINC00829534 | 368.43                     | 50.5              | 3               | 3                | 0             | 3.81                 | -5.08            | Moderately soluble | 0                     | 0.55                  | 0                  |
| ZINC02472705 | 312.32                     | 58.89             | 1               | 3                | 1             | 3.97                 | -5.19            | Moderately soluble | 0                     | 0.55                  | 0                  |
| ZINC02298240 | 313.31                     | 56.24             | 1               | 4                | 0             | 4.15                 | -5.37            | Moderately soluble | 0                     | 0.55                  | 0                  |
| ZINC00348949 | 312.32                     | 47.51             | 1               | 3                | 0             | 3.72                 | -5.36            | Moderately soluble | 0                     | 0.55                  | 0                  |
| ZINC03901817 | 353.33                     | 71.52             | 1               | 4                | 0             | 3.03                 | -4.57            | Moderately soluble | 0                     | 0.55                  | 1                  |
| ZINC00640089 | 370.32                     | 51.1              | 5               | 5                | 1             | 4.08                 | -4.86            | Moderately soluble | 0                     | 0.55                  | 0                  |
| ZINC02502578 | 338.36                     | 51.96             | 3               | 3                | 0             | 3.83                 | -4.87            | Moderately soluble | 0                     | 0.55                  | 0                  |
| ZINC00230567 | 332.36                     | 83.98             | 7               | 4                | 2             | 2.35                 | -4.23            | Moderately soluble | 0                     | 0.55                  | 0                  |
| ZINC00324361 | 329.35                     | 47.89             | 3               | 4                | 0             | 4.17                 | -5.17            | Moderately soluble | 0                     | 0.55                  | 1                  |
| ZINC00709065 | 357.36                     | 76.38             | 4               | 4                | 1             | 3.61                 | -4.79            | Moderately soluble | 0                     | 0.55                  | 0                  |
| ZINC00784494 | 362.4                      | 100.44            | 4               | 4                | 1             | 3.83                 | -5.05            | Moderately soluble | 0                     | 0.55                  | 0                  |
| ZINC00755112 | 369.42                     | 65.08             | 1               | 4                | 0             | 3.82                 | -5.44            | Moderately soluble | 1                     | 0.55                  | 0                  |
| ZINC00786361 | 394.47                     | 58.2              | 8               | 2                | 2             | 4.4                  | -5.66            | Moderately soluble | 1                     | 0.55                  | 0                  |
| ZINC00803271 | 350.8                      | 51.1              | 4               | 2                | 1             | 3.92                 | -4.9             | Moderately soluble | 0                     | 0.55                  | 0                  |
| ZINC01353676 | 369.42                     | 89.21             | 5               | 5                | 0             | 3.24                 | -4.63            | Moderately soluble | 0                     | 0.55                  | 0                  |
| ZINC01786707 | 291.26                     | 64.96             | 1               | 5                | 0             | 2.84                 | -3.77            | Soluble            | 0                     | 0.85                  | 1                  |

**Table S3: Predicted pharmacokinetic properties of LCN2 inhibitors and compound derivatives.**<sup>a</sup> Pgp: P glycoprotein substrate. <sup>b</sup> Log K<sub>p</sub> (cm/s): skin permeation

| Molecule ID         | Pharmacokinetic Properties |              |                            |                  |                   |                  |                  |                  |                                        |
|---------------------|----------------------------|--------------|----------------------------|------------------|-------------------|------------------|------------------|------------------|----------------------------------------|
|                     | GI absorption              | BBB permeant | Pgp <sup>a</sup> substrate | CYP1A2 inhibitor | CYP2C19 inhibitor | CYP2C9 inhibitor | CYP2D6 inhibitor | CYP3A4 inhibitor | log K <sub>p</sub> (cm/s) <sup>b</sup> |
| ZINC00829534        | High                       | Yes          | Yes                        | Yes              | Yes               | Yes              | No               | Yes              | -5.62                                  |
| ZINC02472705        | High                       | Yes          | No                         | Yes              | Yes               | No               | Yes              | No               | -5.08                                  |
| ZINC02298240        | High                       | Yes          | No                         | Yes              | Yes               | No               | No               | No               | -4.9                                   |
| ZINC00348949        | High                       | Yes          | No                         | Yes              | Yes               | No               | No               | No               | -4.89                                  |
| ZINC03901817        | High                       | Yes          | No                         | Yes              | Yes               | Yes              | No               | Yes              | -6.08                                  |
| <b>ZINC00640089</b> | High                       | Yes          | No                         | Yes              | Yes               | Yes              | Yes              | No               | -5.68                                  |
| ZINC02502578        | High                       | Yes          | No                         | Yes              | Yes               | Yes              | No               | No               | -5.54                                  |
| ZINC00230567        | High                       | No           | No                         | No               | Yes               | Yes              | Yes              | Yes              | -5.78                                  |
| ZINC00324361        | High                       | Yes          | No                         | Yes              | Yes               | Yes              | No               | No               | -4.92                                  |
| ZINC00709065        | High                       | No           | No                         | Yes              | Yes               | Yes              | No               | No               | -5.72                                  |
| <b>ZINC00784494</b> | High                       | No           | No                         | Yes              | Yes               | Yes              | No               | Yes              | -5.55                                  |
| ZINC00755112        | High                       | Yes          | Yes                        | Yes              | Yes               | Yes              | No               | No               | -5.38                                  |
| ZINC00786361        | High                       | Yes          | Yes                        | No               | Yes               | Yes              | Yes              | Yes              | -4.91                                  |
| ZINC00803271        | High                       | Yes          | No                         | Yes              | Yes               | Yes              | No               | Yes              | -5.49                                  |
| ZINC01353676        | High                       | No           | No                         | Yes              | Yes               | Yes              | No               | No               | -5.91                                  |
| ZINC01786707        | High                       | Yes          | No                         | Yes              | Yes               | Yes              | No               | No               | -6.06                                  |

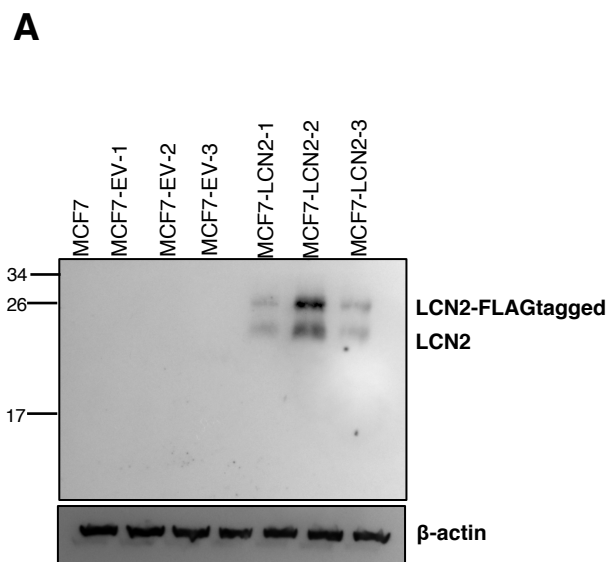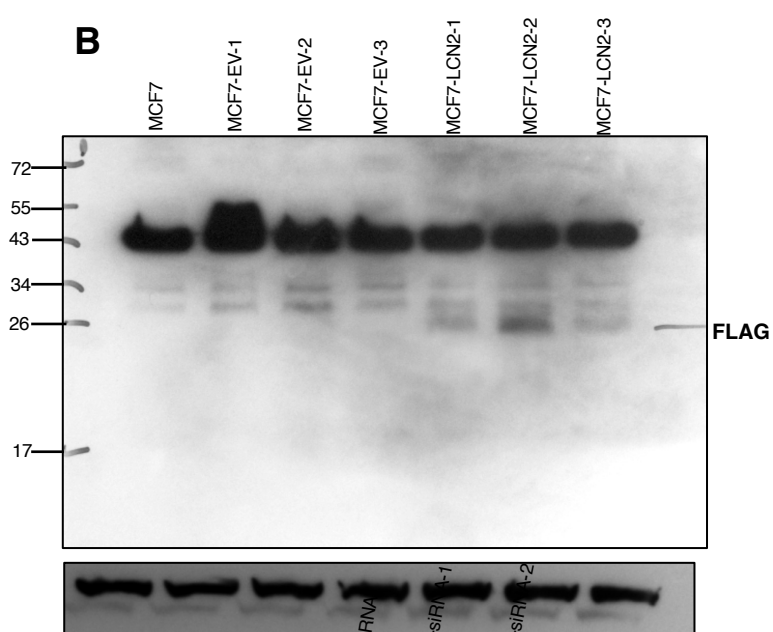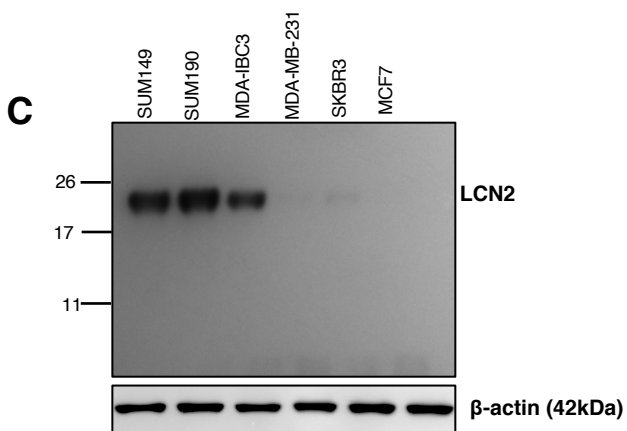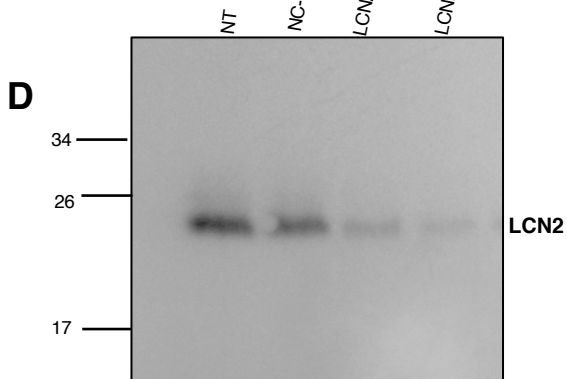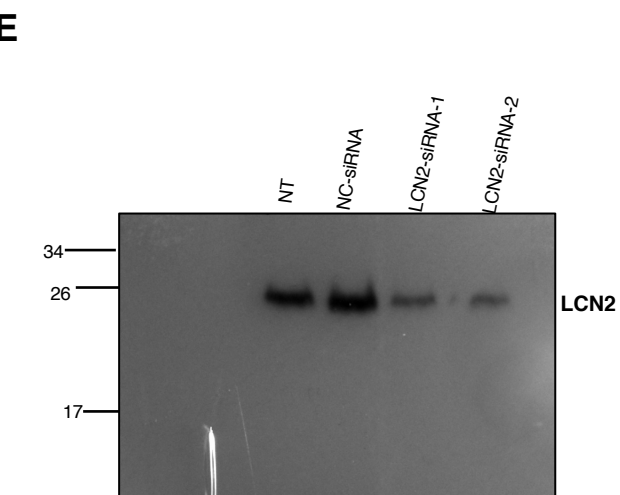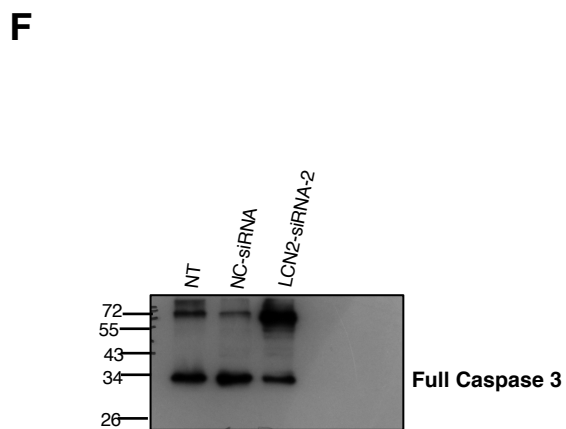

**G**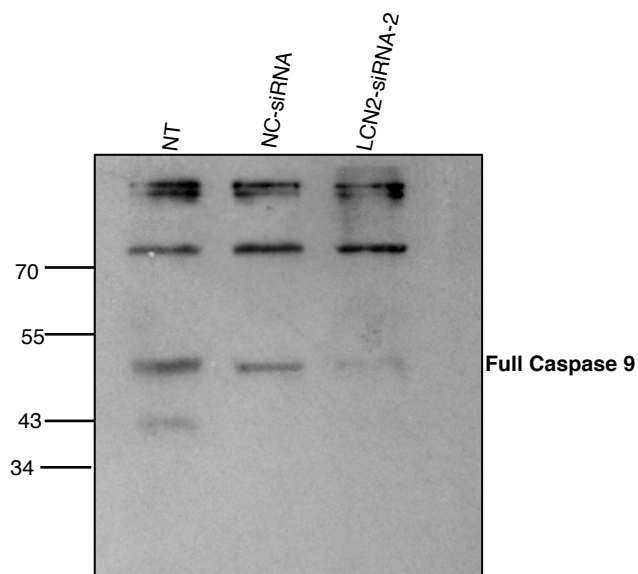**H**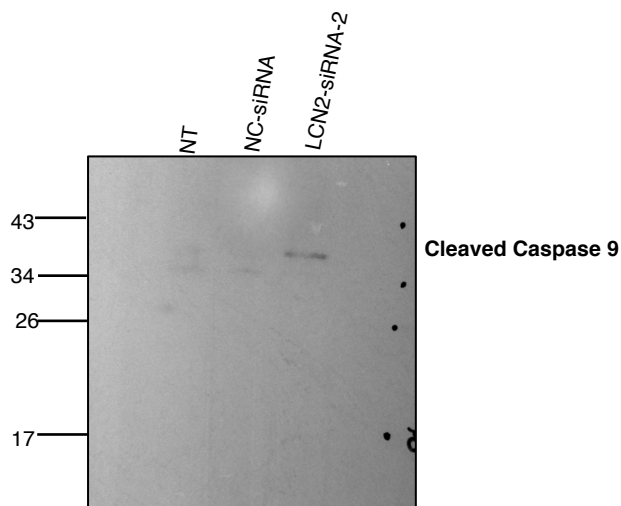**I**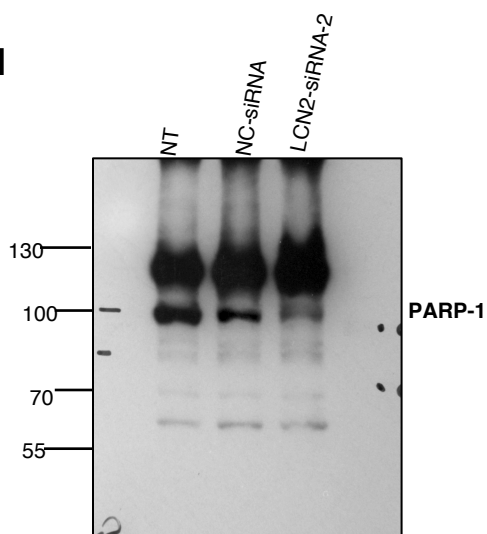**J**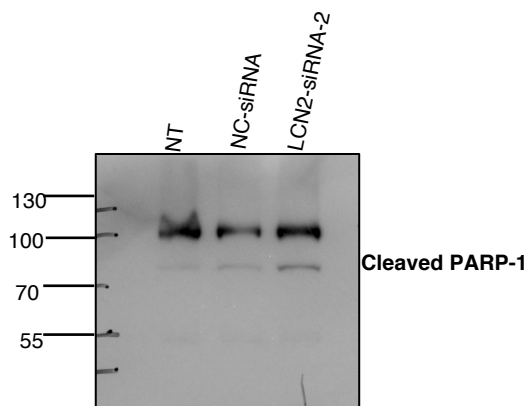**K**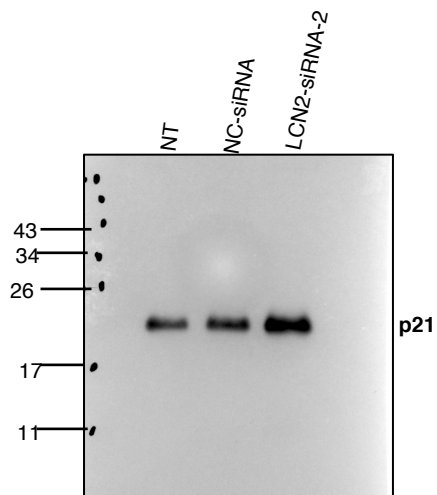**L**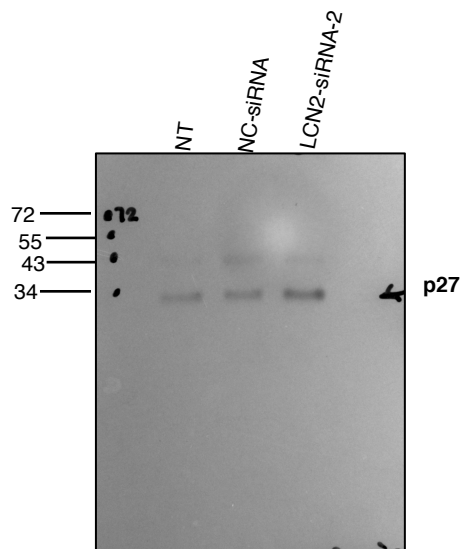

**M**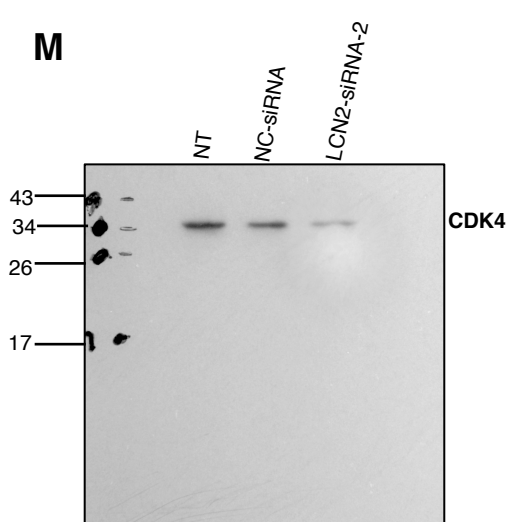**N**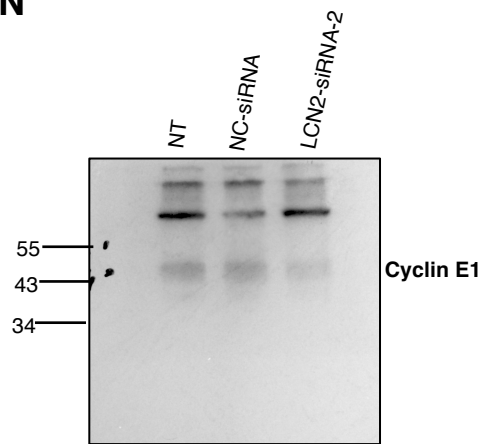**O**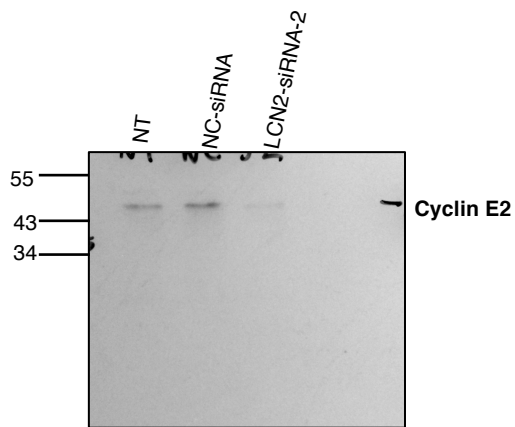**P**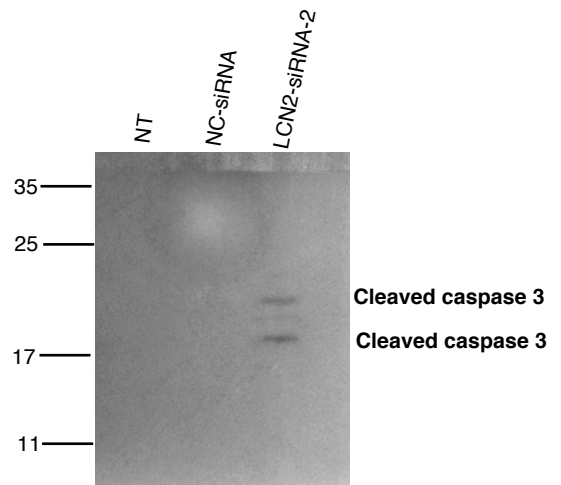

**Figure S5| Western blot images.** Protein bands and molecular weight markers are shown for (A) LCN2 (B) LCN2-FLAG-tagged, (C) Figure 1A, (D) Figure 1C, (E) Figure 1D, (F) Figure 2B, (G) Figure 2B, (H) Figure 2B, (I) Figure 2B, (J) Figure 2B, (K) Figure 2E, (L) Figure 2E, (M) Figure 2E, (N) Figure 2E, (O) Figure 2E, and (P) Figure 3B.
